# Supplementary material for: Long-term treatment with imatinib results in profound mast cell deficiency in Ph+ chronic myeloid leukemia
Source: PubMed Central journal article supplement (PMC4413638; doi:10.18632/oncotarget.3074), 2014-12-26
Supplement: oncotarget-06-3071-s001.pdf [file oncotarget-06-3071-s001.pdf]

# Long-term treatment with imatinib results in profound mast cell deficiency in Ph+ chronic myeloid leukemia

## Supplemental Material

### Tables

#### Supplemental Table S1

Oligonucleotide primer sequences for quantitative PCR

| Gene           | Primer Sequence          |
|----------------|--------------------------|
| Tryptase -fwd  | CGGGAACACCCGGAGGGACT     |
| Tryptase -rev  | GCCTGCAGCCAGGTGCCATT     |
| CD117 -fwd     | GCGTTCTGCTCCTACTGCTTCG   |
| CD117 -rev     | CCCTGGACTCACAGATGGTTGA   |
| ABL -fwd       | TGTATGATTTTGTGGCCAGTGGAG |
| ABL -rev       | GCCTAAGACCCGGAGCTTTTCA   |
| ABL/EXON1- fwd | GCTGTCCTCGTCCTCCAGCTGTT  |
| ABL/EXON1- rev | TCAGATGCTACTGGCCGCTGAAG  |

CD, cluster of differentiation; fwd, forward; rev, reverse.

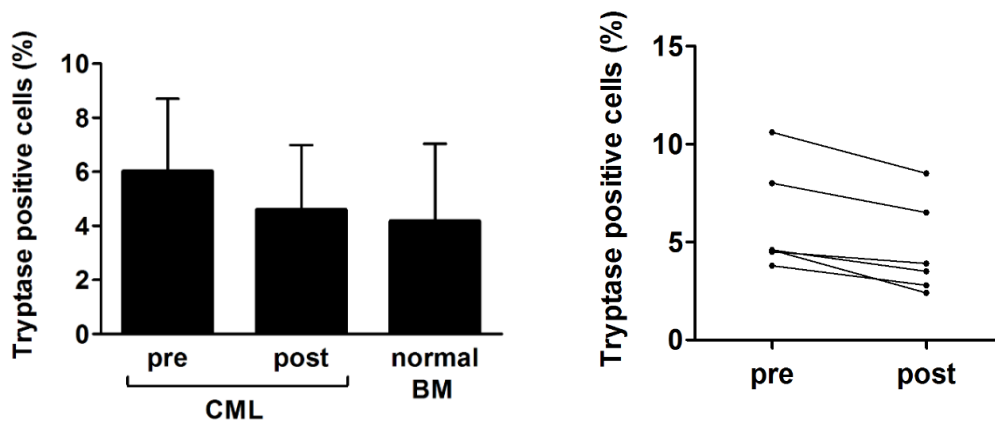

Cerny-Reiterer et al, Supplemental Figure 1A

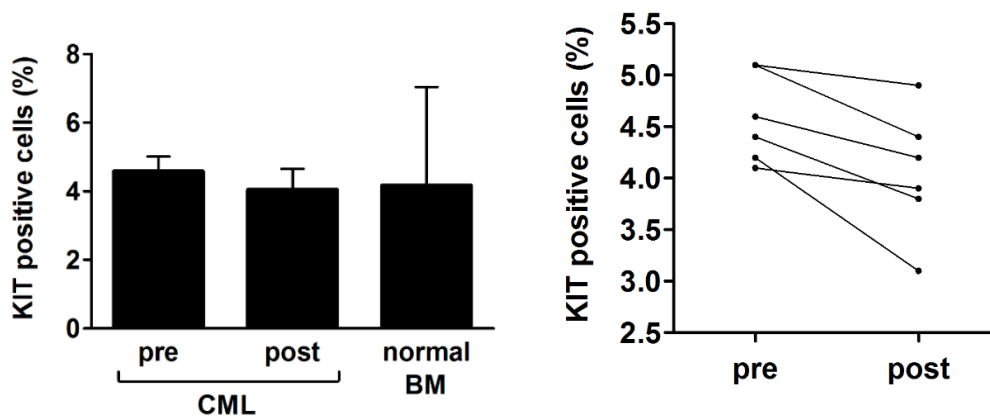

Cerny-Reiterer et al, Supplemental Figure 1B

**Supplemental Figure S1:** Effects of imatinib on mast cell (MC) numbers in the bone marrow of patients with CML within the first 12 months. Bone marrow (BM) biopsy material was obtained from BM sections of CML patients (n=6) at diagnosis (pre) and after (post) treatment with imatinib (400 mg/day) for less than 1 year. In addition, control BM section from 5 patients were examined. Serial sections were prepared from paraffin-embedded BM specimens and stained with antibodies against tryptase (A) or KIT (B) by indirect immunohistochemistry. The percentages of tryptase+ MC and KIT+ MC relative to all nucleated BM cells (500 cells counted) was determined using an Olympus AX-1 microscope equipped with a 100x/1.35 UPlan-Apo objective lens. Results in the left panels represent the mean±S.D. (percent-values) from all donors before and after therapy, and a comparison to normal control BM samples (n=5). The right panels show the percentages of tryptase+ MC (A) or KIT+ MC (B) in each individual patient before (pre) and after (post) therapy.
